# Supplementary material
Source: PubMed Central journal article supplement (PMC10828292)

## Supplementary Materials

**Journal:** GeroScience

**Title:** Hawaiian native herb Mamaki prevents dementia by ameliorating neuropathology and repairing neurons in four different mouse models of neurodegenerative diseases

**Authors:** Tomohiro Umeda, Keiko Shigemori, Rumi Uekado, Kazunori Matsuda, Takami Tomiyama\*

\*Department of Translational Neuroscience, Osaka Metropolitan University Graduate School of Medicine, E-mail: [tomi@omu.ac.jp](mailto:tomi@omu.ac.jp).

**Supplementary Figure 1. Representative HPLC and MS chromatograms of catechin, chlorogenic acid, and rutin in Mamaki preparations.** In each figure, the upper shows the result of the standard substance and the lower is that of the test material extracted from the simple crush powder of Mamaki leaves. (A) For catechin, the extracts were appropriately diluted and separated by HPLC and each fraction was sequentially analyzed by ESI-MS. (B) For chlorogenic acid, the extracts were appropriately diluted and separated by HPLC and the absorbance at 325 nm of each fraction was measured. (C) For rutin, the extracts were appropriately diluted and separated by HPLC and the absorbance at 360 nm of each fraction was measured.

### A. Catechin

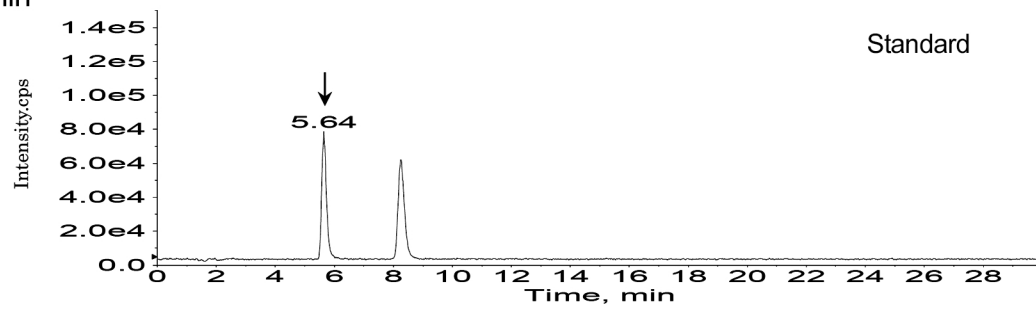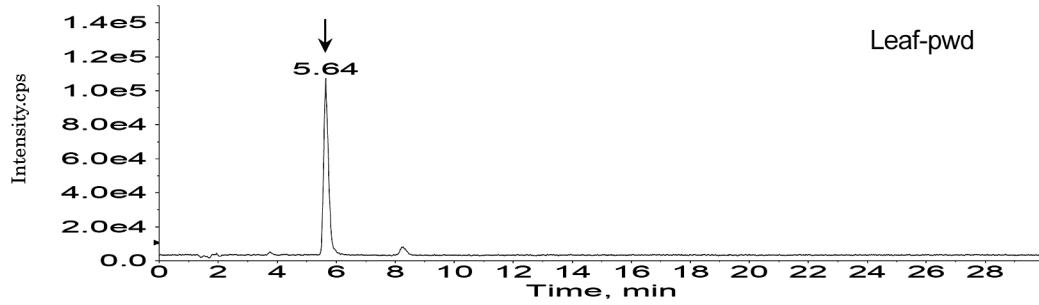

### B. Chlorogenic acid

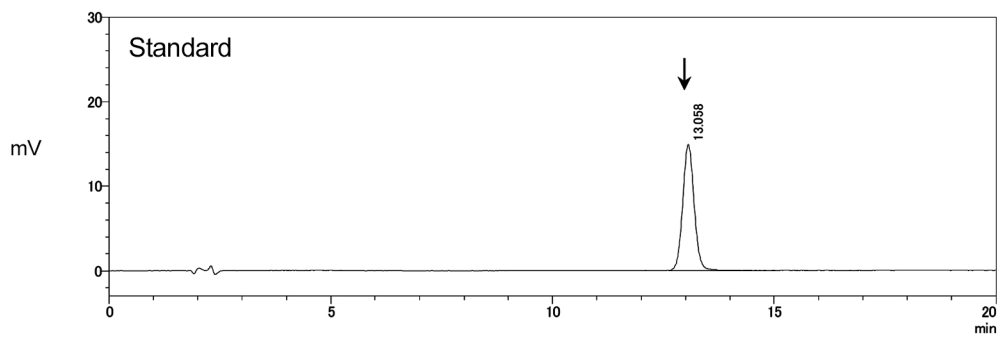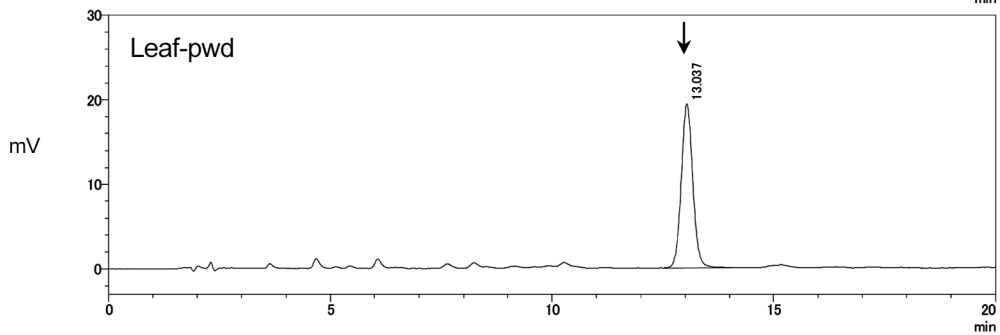

### C. Rutin

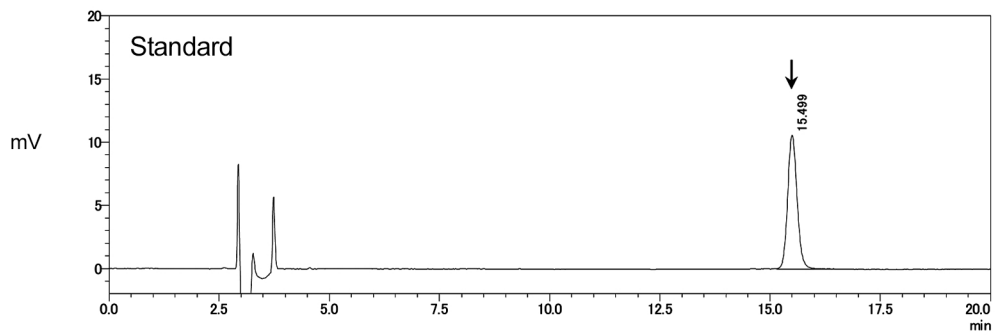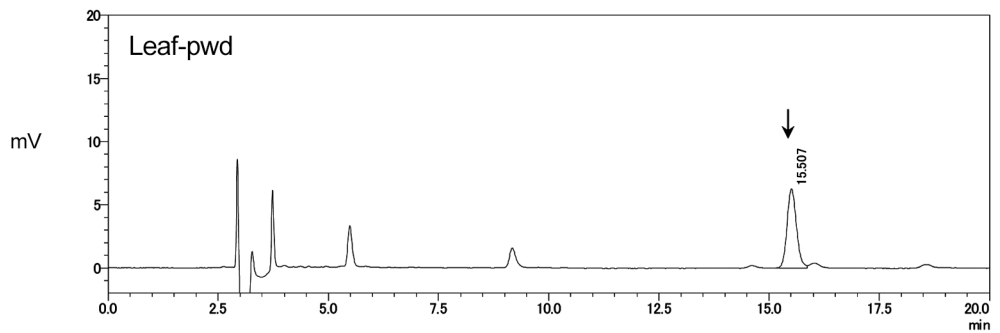

Supplement: 11357_2023_950_MOESM1_ESM.pdf [file 11357_2023_950_MOESM1_ESM.pdf]
